# Supplementary material for: Surface enhanced Raman scattering-active worm-like Ag clusters for sensitive and selective detection of dopamine
Source: Royal Society of Chemistry journal article supplement (doi:10.1039/c4ay03061c), 2015-01-01
Supplement: c4ay03061c1.pdf [file c4ay03061c1.pdf]

# Surface enhanced Raman scattering active worm-like Ag clusters for sensitive and selective detection of dopamine

Sivakumar Palanisamy,<sup>a,b</sup> Lanqin Yan,<sup>a</sup> Xuehua Zhang,<sup>\*,a</sup> and Tao He<sup>\*,a</sup>

<sup>a</sup>Laboratory of Nanosystem and Hierarchical Fabrication, National Centre for Nanoscience and Technology, Beijing 100190, China.

<sup>b</sup>University of Chinese Academy of Sciences, Beijing 100049, China.

## 1) SEM images for Ag films prepared under different sputtering time.

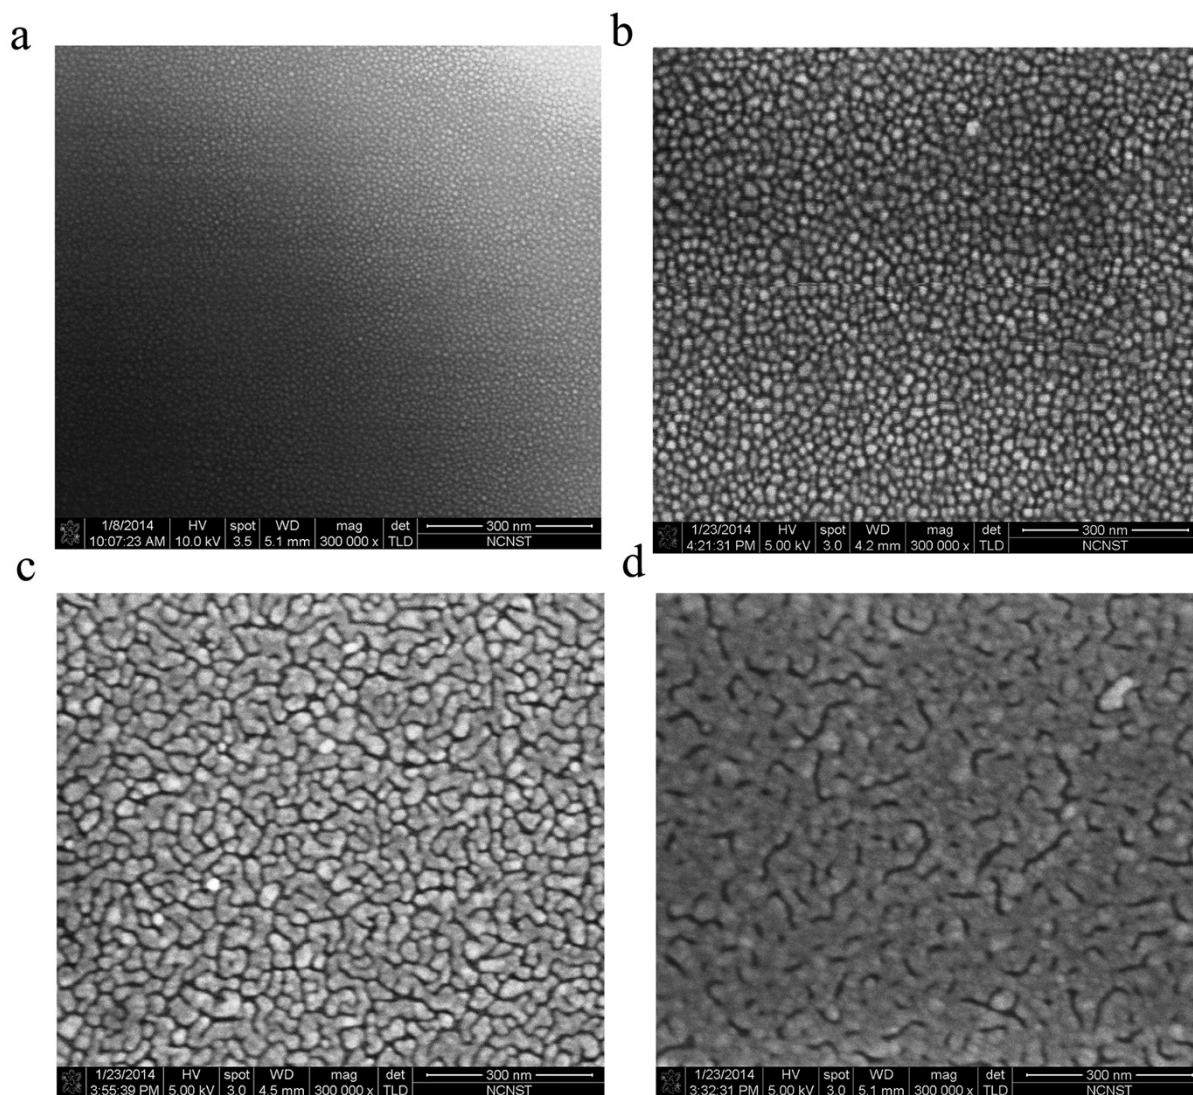

Fig. S1 SEM images for Ag films prepared under (a) 5, (b) 40, (c) 80 and (d) 120 s sputtering time

## 2) Ellipsometric delta and psi fitting for Ag films prepared under different sputtering time

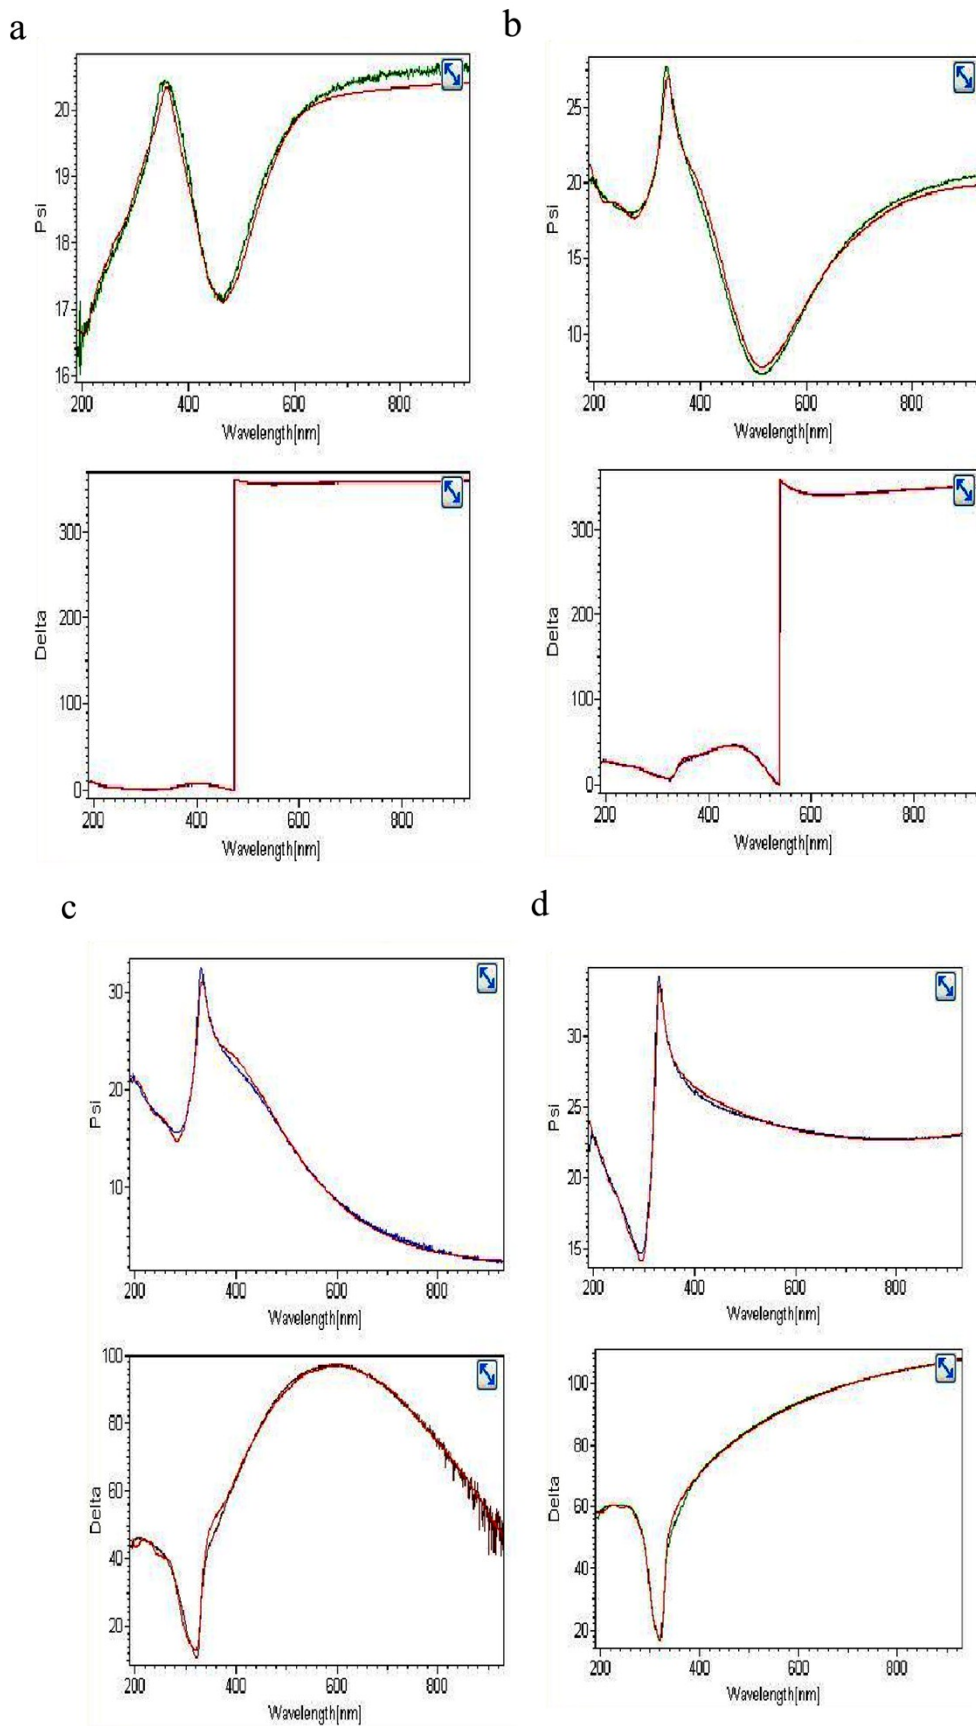

**Fig. S2** Ellipsometric fitting of delta and psi for Ag films prepared under (a) 5, (b) 40, (c) 80 and (d) 120 s sputtering time

### 3) SERS spectra for Ag film prepared under different sputtering time in the presence of 10.0 $\mu\text{M}$ DA

**Table S1** SERS characteristic peaks for DA adsorbed Ag film

| Raman band ( $\text{cm}^{-1}$ ) | Functional groups         |
|---------------------------------|---------------------------|
| 148, 239                        | $V(\text{Ag-O})$          |
| 480                             | $V(\text{Ag-O-Ag})$       |
| 614, 692                        | $V(\text{C-C})$           |
| 822, 1054                       | $V(\text{C-O-C})$         |
| 880                             | $V(\text{O-O})$           |
| 1318, 1523                      | $V(\text{C}_6\text{H}_6)$ |

Abbreviations;  $V(\text{Ag-O})$ : Ag-O vibration,  $V(\text{Ag-O-Ag})$ : Ag-O-Ag vibration,  $V(\text{C-C})$ : aliphatic carbon chain vibration,  $V(\text{C-O-C})$ : C-O-C vibration,  $V(\text{O-O})$ : O-O vibration and  $V(\text{C}_6\text{H}_6)$ : benzene ring vibration.

### 4) SEM images for Ag films prepared under different pressure.

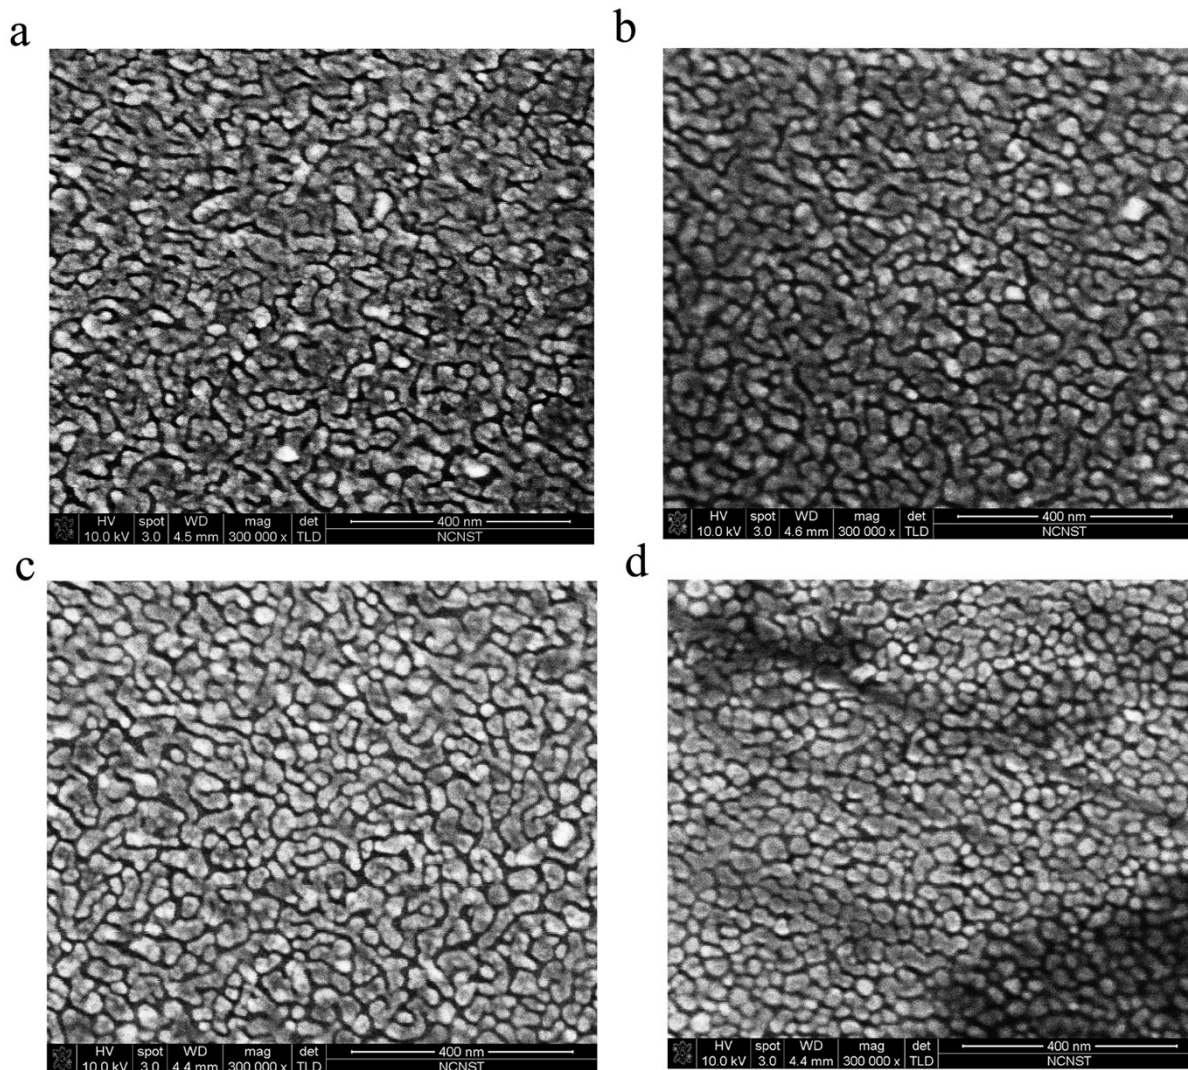

**Fig. S3** SEM images for Ag films prepared under (a) 4, (b) 6, (c) 8 and (d) 12 mTorr pressure.

**5) Ellipsometric delta and psi fitting for Ag films prepared under different pressure**

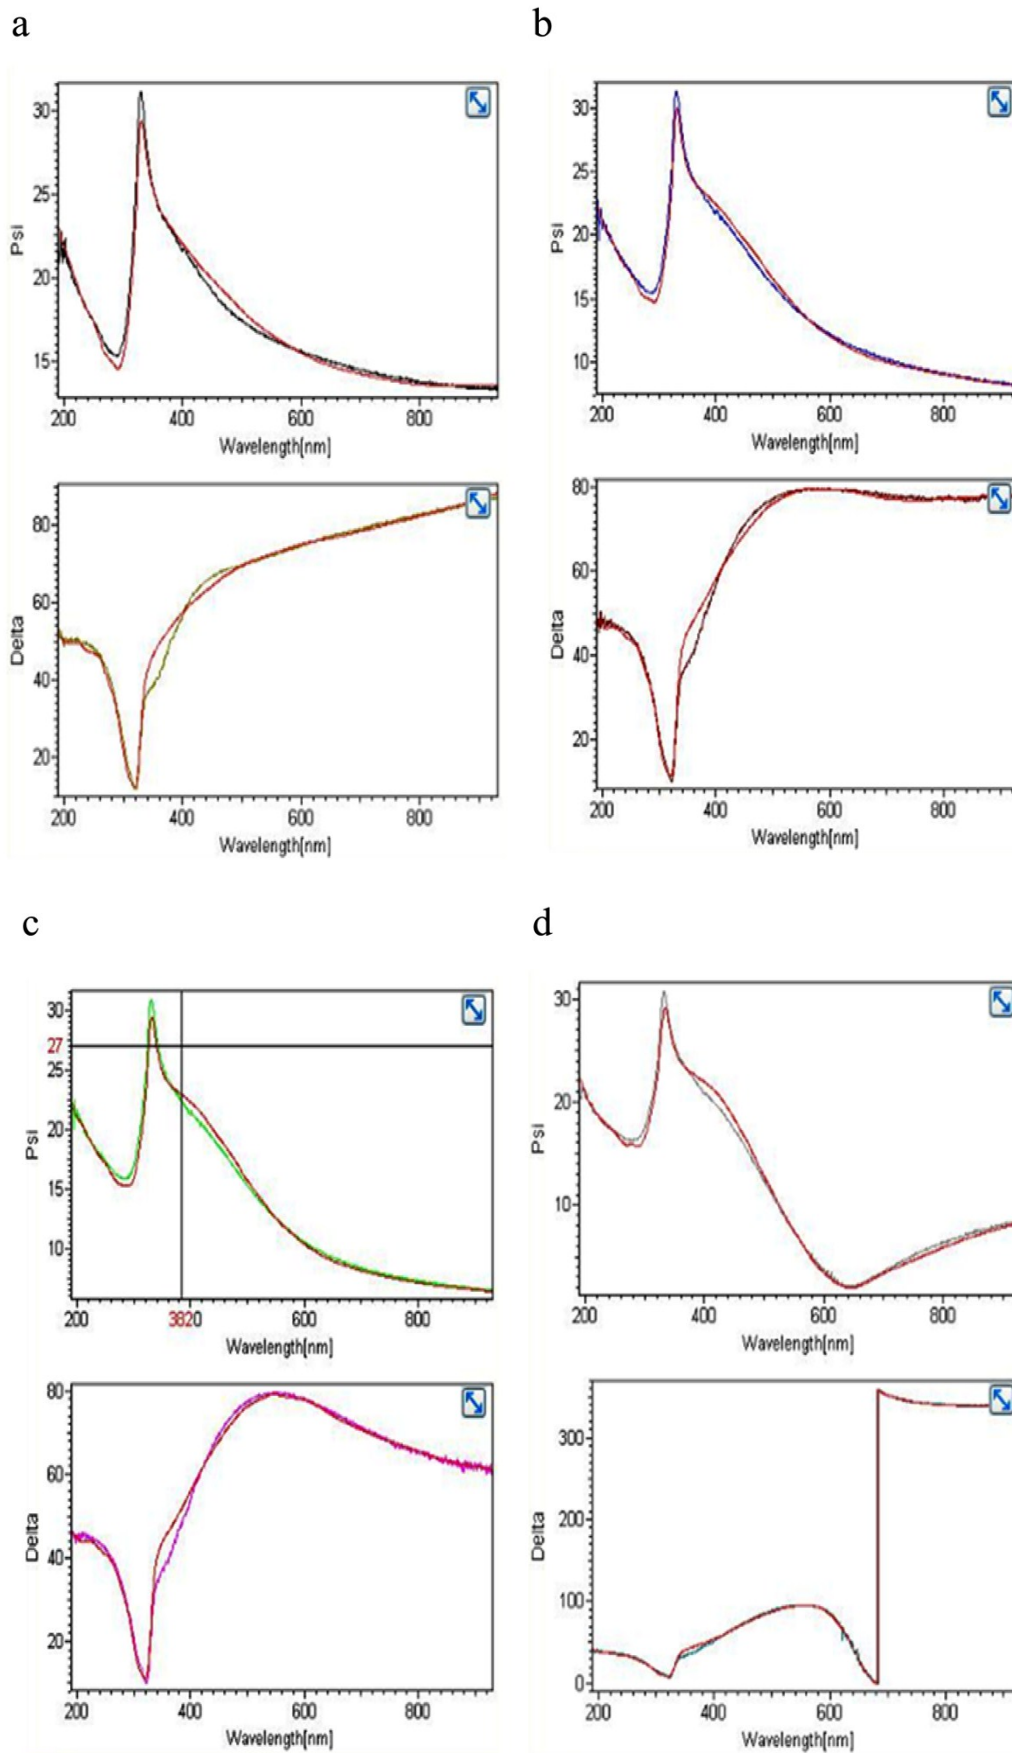

**Fig. S4** Ellipsometric fitting of delta and psi for Ag films prepared under (a) 4, (b) 6, (c) 8 and ((d) 12 mTorr pressure

**6) SEM images for Ag films prepared under different RF power**

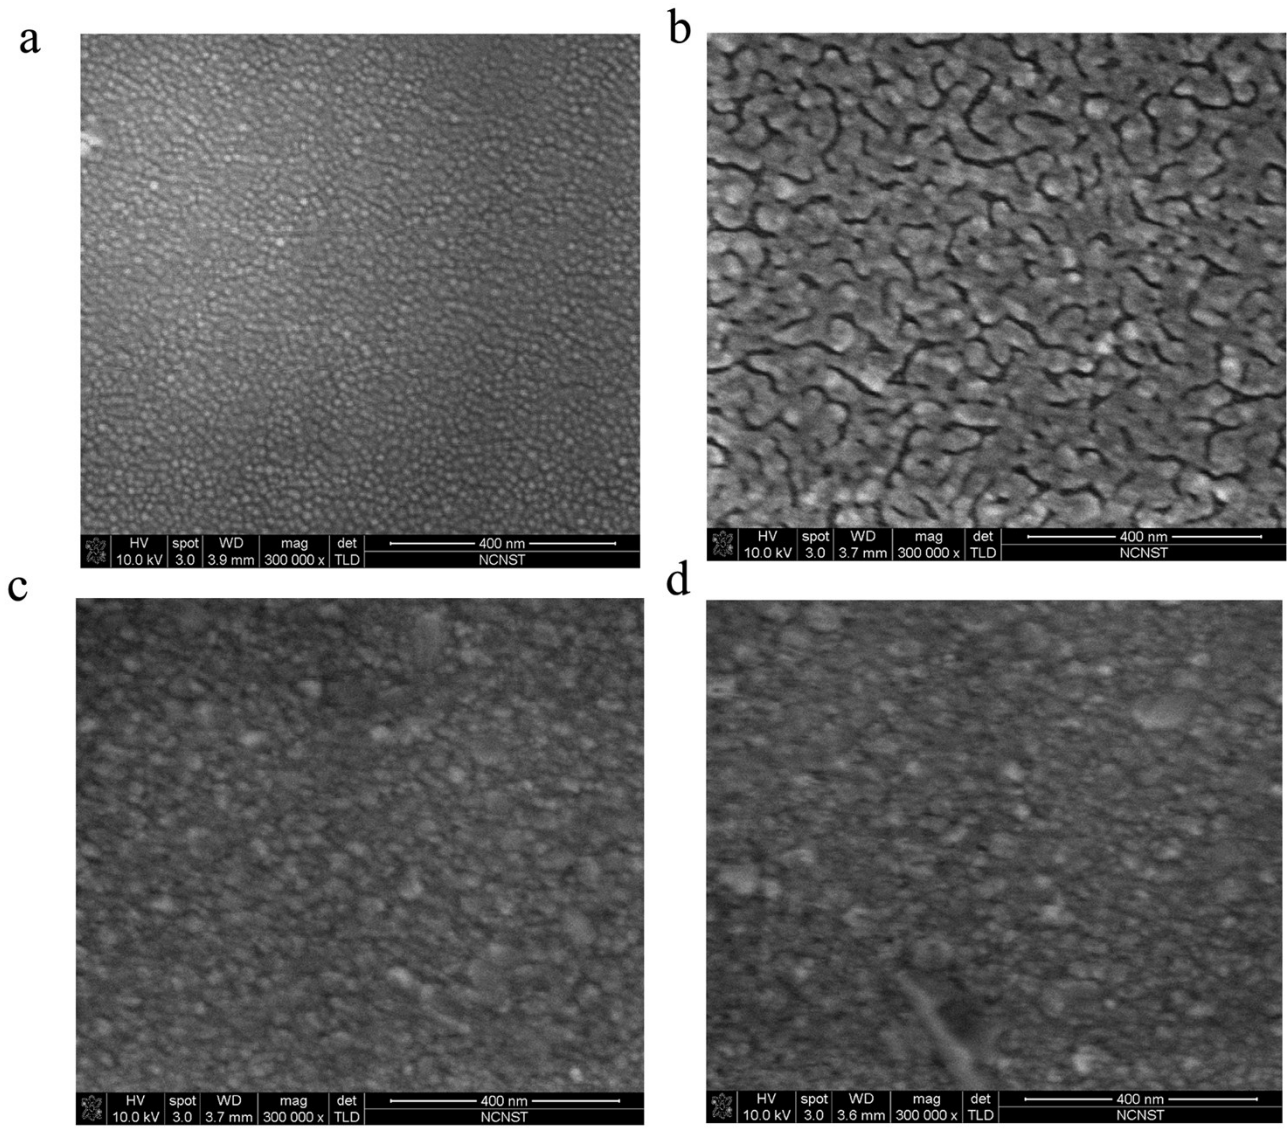

**Fig. S5** SEM images for Ag films prepared under (a) 25, (b) 75, (c) 100 and (d) 125 W RF power.

**7) Ellipsometric delta and psi fitting for Ag films prepared under different RF power**

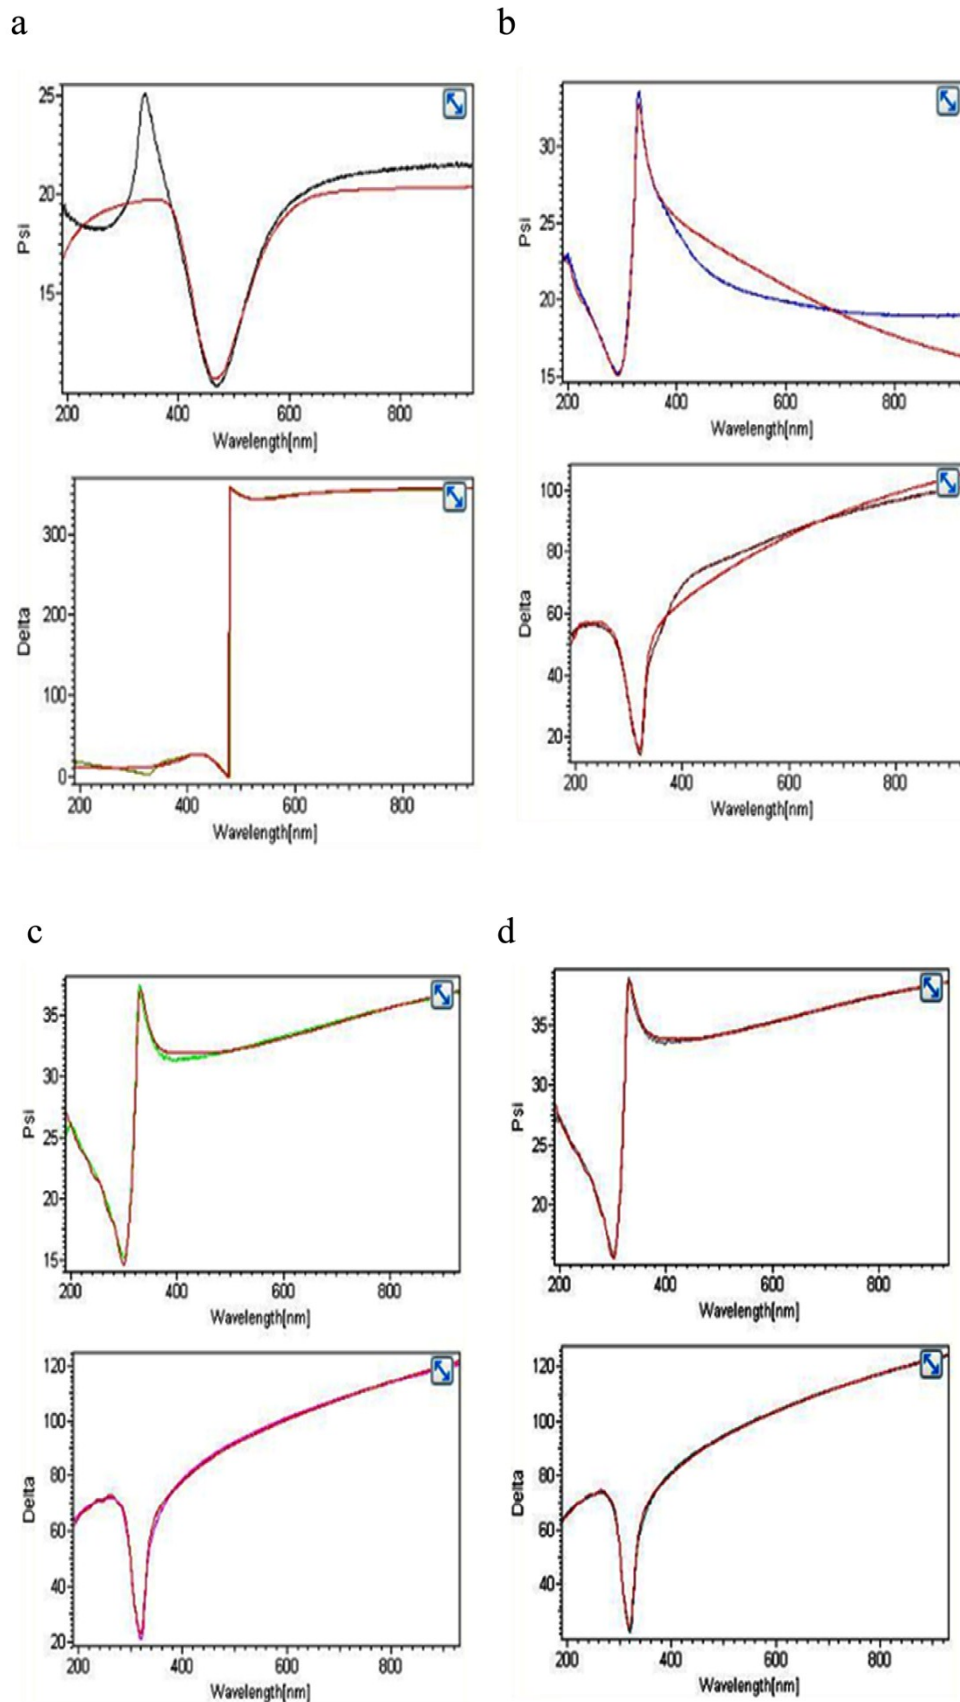

**Fig. S6** Ellipsometric fitting of delta and psi for Ag films prepared under (a) 25, (b) 75, (c) 100 and (d) 125 W RF power.

## 8) Calculation of the enhancement factor

The enhancement factor of the SERS substrate can be calculated through the following equation [18].

$$EF = (I_{\text{SERS}} \times N_{\text{RS}}) / (I_{\text{RS}} \times N_{\text{SERS}})$$

Where,

EF – Enhancement factor of the SERS substrate

$I_{\text{SERS}}$  – Intensity of the strongest peak in the SERS spectra

$I_{\text{RS}}$  – Intensity of the same peak (as observed in the SERS spectra) for the normal Raman spectra

$N_{\text{SERS}}$  – Number of molecules adsorbed on the scattering volume for the SERS spectra

$N_{\text{RS}}$  – Number of molecules in the scattering volume for the normal Raman spectra (not necessary to be adsorbed)

### Enhancement factor of worm-like Ag clusters modified substrate

Here, we employed the strongest peak at  $1523 \text{ cm}^{-1}$  to estimate the EF of worm-like Ag clusters modified substrate.

Observed peak intensity at  $1523 \text{ cm}^{-1}$  for the SERS spectra ( $I_{\text{SERS}}$ ) = 29403

Observed peak intensity at  $1523 \text{ cm}^{-1}$  for the normal Raman spectra ( $I_{\text{RS}}$ ) = 14111

Observed number of molecules adsorbed on the scattering volume for SERS spectra ( $N_{\text{SERS}}$ ) =  $C_{\text{SERS}} \times V_{\text{SERS}}$

Where,

$C_{\text{SERS}}$  – the concentration of molecules used for the SERS spectra ( $10 \times 10^{-6} \text{ M}$ )

$V_{\text{SERS}}$  – Scattering volume which contributed in the SERS spectra of molecule. This is equal to the number of worm-like Ag clusters deposited on the glass substrate. Here, it is assumed that the worm-like Ag clusters were deposited on the glass substrate as a monolayer.

That means the total scattering volume ( $V_{\text{SERS}}$ ) = surface area of the substrate  $\times$  size of worm-like Ag cluster  
 $= 0.5 \text{ cm}^2 \times 38 \text{ nm} = 0.5 \times 10^{-4} \times 38 \times 10^{-9} = 1.9 \times 10^{-12} \text{ m}$

Therefore,  $N_{\text{SERS}} = 10 \times 10^{-6} \times 1.9 \times 10^{-12} = 1.9 \times 10^{-17}$

Observed number of molecules adsorbed on the scattering volume for the normal Raman spectra ( $N_{\text{RS}}$ ) =  $C_{\text{RS}} \times V_{\text{RS}}$

Where,

$C_{\text{RS}}$  – the concentration of molecules used for the normal Raman spectra ( $10 \times 10^{-6} \text{ M}$ )

$V_{\text{RS}}$  – Scattering volume which contributed in the normal Raman spectra of molecule. This is equal to the surface area of the substrate that we have used for the Raman measurement ( $0.5 \times 10^{-4} \text{ m}$ ).

Therefore,  $N_{\text{RS}} = 10 \times 10^{-6} \times 0.5 \times 10^{-4} = 5 \times 10^{-10}$



Now, the EF of worm-like Ag clusters modified substrate is

$$= (29403 \times 5 \times 10^{-10}) / (14111 \times 1.9 \times 10^{-17}) = \mathbf{5.4 \times 10^7}$$

**Enhancement factor for the Ag NPs@Citrate deposited on the scaffold of worm-like Ag clusters modified substrate**

Observed peak intensity at 1523 cm<sup>-1</sup> for the SERS spectra ( $I_{\text{SERS}}$ ) = 31626

Observed peak intensity at 1523 cm<sup>-1</sup> for the normal Raman spectra ( $I_{\text{RS}}$ ) = 29403

Observed number of molecules adsorbed on the scattering volume for the SERS spectra ( $N_{\text{SERS}}$ ) =  $C_{\text{SERS}} \times V_{\text{SERS}}$

Where,

$C_{\text{SERS}}$  – the concentration of molecules used for the SERS spectra ( $10 \times 10^{-6}$  M)

$V_{\text{SERS}}$  – Scattering volume which contributed in the SERS spectra of molecule. This is equal to the number of Ag NPs@Citrate deposited on the scaffold of worm-like Ag clusters modified substrate. Here, it is assumed that the Ag NPs@Citrate was deposited on the scaffold of worm-like clusters modified substrate as a monolayer.

That means the total scattering volume ( $V_{\text{SERS}}$ ) = surface area of the substrate  $\times$  the size of worm-like Ag cluster  $\times$  the size of Ag NPs@Citrate

$$= 0.5 \text{ cm}^2 \times 38 \text{ nm} \times 28 \text{ nm} = 0.5 \times 10^{-4} \times 38 \times 10^{-9} \times 28 \times 10^{-9} = 5.3 \times 10^{-20} \text{ m}$$

Therefore,  $N_{\text{SERS}} = 10 \times 10^{-6} \times 5.3 \times 10^{-20} = 5.3 \times 10^{-25}$

Observed number of molecules adsorbed on the scattering volume for the normal Raman spectra ( $N_{\text{RS}}$ ) =  $C_{\text{RS}} \times V_{\text{RS}}$

Where,

$C_{\text{RS}}$  – the concentration of molecules used for the normal Raman spectra ( $10 \times 10^{-6}$  M)

$V_{\text{RS}}$  – Scattering volume which contributed in the normal Raman spectra of molecule. This is equal to the number of worm-like Ag clusters deposited on the glass substrate.

That means the total scattering volume ( $V_{\text{RS}}$ ) = surface area of the substrate  $\times$  the size of Ag cluster

$$= 0.5 \text{ cm}^2 \times 38 \text{ nm} = 0.5 \times 10^{-4} \times 38 \times 10^{-9} = 1.9 \times 10^{-12} \text{ m}$$

Therefore,  $N_{\text{RS}} = 10 \times 10^{-6} \times 1.9 \times 10^{-12} = 1.9 \times 10^{-17}$

Now, the EF for Ag NPs@Citrate deposited on the scaffold of worm-like Ag clusters modified substrate is

$$= (31626 \times 1.9 \times 10^{-17}) / (29403 \times 5.3 \times 10^{-25}) = \mathbf{3.8 \times 10^7}$$

**Enhancement factor for the Ag NPs@Citrate-BDT deposited on the scaffold of worm-like Ag clusters modified substrate**

Observed peak intensity at 1523 cm<sup>-1</sup> for the SERS spectra ( $I_{\text{SERS}}$ ) = 69719

Observed peak intensity at 1523 cm<sup>-1</sup> for the normal Raman spectra ( $I_{\text{RS}}$ ) = 29403

Observed number of molecules adsorbed on the scattering volume for the SERS spectra ( $N_{\text{SERS}}$ ) =  $C_{\text{SERS}} \times V_{\text{SERS}}$

Where,

$C_{\text{SERS}}$  – the concentration of molecules used for the SERS spectra ( $10 \times 10^{-6}$  M)

$V_{\text{SERS}}$  – Scattering volume which contributed in the SERS spectra of molecule. This is equal to the number of Ag NPs@Citrate-BDT deposited on the scaffold of worm-like Ag clusters modified substrate. Here, it is assumed that the Ag NPs@Citrate-BDT was deposited on the scaffold of worm-like Ag clusters modified substrate as a monolayer.

That means the total scattering volume ( $V_{\text{SERS}}$ ) = surface area of the substrate  $\times$  the size of Ag cluster  $\times$  the size of Ag NPs@Citrate-BDT

$$= 0.5 \text{ cm}^2 \times 38 \text{ nm} \times 35 \text{ nm} = 0.5 \times 10^{-4} \times 38 \times 10^{-9} \times 35 \times 10^{-9} = 6.6 \times 10^{-20} \text{ m}$$

Therefore,  $N_{\text{SERS}} = 10 \times 10^{-6} \times 6.6 \times 10^{-20} = 6.6 \times 10^{-25}$

Observed number of molecules adsorbed on the scattering volume for the normal Raman spectra ( $N_{\text{RS}}$ ) =  $C_{\text{RS}} \times V_{\text{RS}}$

Where,

$C_{\text{RS}}$  – the concentration of molecules used for the normal Raman spectra ( $10 \times 10^{-6}$  M)

$V_{\text{RS}}$  – Scattering volume which contributed in the normal Raman spectra of molecule. This is equal to the number of worm-like Ag clusters deposited on the glass substrate.

That means the total scattering volume ( $V_{\text{RS}}$ ) = surface area of the substrate  $\times$  the size of Ag cluster

$$= 0.5 \text{ cm}^2 \times 38 \text{ nm} = 0.5 \times 10^{-4} \times 38 \times 10^{-9} = 1.9 \times 10^{-12} \text{ m}$$

Therefore,  $N_{\text{RS}} = 10 \times 10^{-6} \times 1.9 \times 10^{-12} = 1.9 \times 10^{-17}$

Now, the EF for the Ag NPs@Citrate-BDT deposited on the scaffold of worm-like Ag clusters modified substrate is

$$= (69719 \times 1.9 \times 10^{-17}) / (29403 \times 6.6 \times 10^{-25}) = \mathbf{6.8 \times 10^7}$$
